# Supplementary material
Source: PubMed Central journal article supplement (PMC5953515)

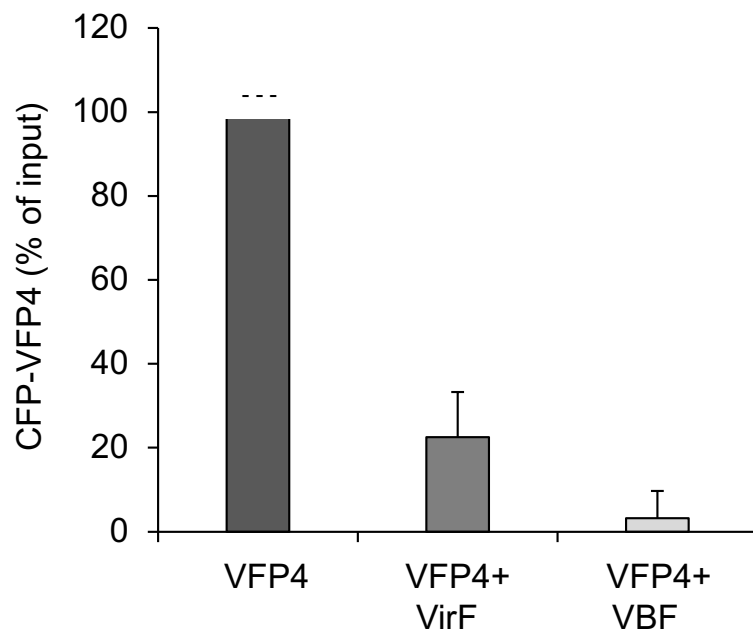

Supplement: NIHMS965592-supplement-FS1.pdf [file NIHMS965592-supplement-FS1.pdf]
